# Supplementary material for: Computational modeling of pancreatic cancer patients receiving FOLFIRINOX and gemcitabine-based therapies identifies optimum intervention strategies
Source: PLoS One. 2019 Apr 26;14(4):e0215409. doi: 10.1371/journal.pone.0215409 (PMC6485645; doi:10.1371/journal.pone.0215409)
Supplement: S1 Data — The estimated growth rates and LAI/MAI values for both primary and metastatic sites for each patient are provided. (XLSX) [file pone.0215409.s001.xlsx]

## Sheet: primary notreatment
ID	LAI	Growth	B
1	0.281192	0.618472	1.87053
2	0.151894	0.279996
3	1.39399	0.0811009
4	0.310906	0.117273
5	6.94368	0.171033
6	0.853977	0.16066
7	0.52601	0.184689
8	0.0300597	0.23922
9	0.339236	0.352134
10	0.10737	0.677598
11	0.0764602	0.341942
12	0.595675	0.219965
13	1.27656	0.158954
14	0.446261	0.303888
15	0.073835	0.0687407
16	0.301045	0.125304
17	2.18848	0.513527
18	0.546348	0.0101026
19	0.322595	0.370602
20	0.22364	0.290519
21	0.409624	0.538552
22	0.616374	0.255044
23	1.04543	0.101009
24	2.90063	0.0877022
25	0.68741	0.249058
26	0.350431	0.373406
27	1.69558	0.157371
28	0.37103	0.182059
29	0.966928	0.446221
30	0.082998	0.412263
31	2.63466	0.0628214
32	0.707978	0.481112
33	0.0615006	0.554118
34	0.221101	0.500292
35	0.800393	0.153697
36	0.113843	0.281125
37	3.96757	0.348076
38	0.286851	0.403422
39	0.245524	0.269329
40	0.203437	0.479118
41	3.36424	0.443919
42	0.69993	0.507756
43	0.0661777	0.0234147
44	12.908	0.1775
45	0.347478	0.338532
46	0.587262	0.158837
47	0.629039	0.367136
48	0.342399	0.545179
49	0.492977	0.246736
50	0.440941	0.239524
51	2.17006	0.0762336
52	0.864923	0.489423
53	0.857718	0.332588
54	3.37163	0.275429
55	0.167876	0.238511
56	1.12012	0.340861
57	3.66628	0.162559
58	0.524322	0.429733
59	0.821489	0.462682
60	1.73762	0.142332
61	1.01537	0.273148
62	0.354814	0.421364
63	0.764764	0.485668
64	0.465369	0.412486
65	1.39731	0.546134
66	0.228895	0.33838
67	0.252214	0.465703
68	0.383431	0.296146
69	0.330607	0.169098
70	0.0827946	1.02423
71	0.629379	0.237994
72	0.589279	0.430329
73	0.897966	0.292264
74	1.92376	0.066186
75	0.426438	0.117699
76	0.580015	0.154086
77	3.00827	0.109758
78	0.585603	0.354467
79	2.47003	0.27987
80	0.296687	0.460869
81	0.514696	0.615521
82	0.287051	0.339736
83	0.627383	0.0711123
84	0.342462	0.123938
85	1.22437	0.111909
86	1.04027	0.399763
87	0.237328	0.262187
88	1.96495	0.259718
89	1.10482	0.0532032
90	0.130138	0.452047
91	0.728957	0.405233
92	0.828138	0.0750342
93	1.5777	0.204904
94	0.274945	0.203723
95	2.16434	0.273434

## Sheet: metastasis notreatment
ID	MAI	Growth	B
1	1.39218	0.789503	25.653
2	0.0406113	1.19614
3	1.40968	0.508646
4	0.243034	1.78153
5	1.13236	0.600144
6	0.466965	1.6037
7	0.0444913	1.00011
8	1.70208	0.467372
9	0.131227	0.882069
10	0.989761	0.145481
11	0.862482	2.21476
12	4.78669	0.363826
13	0.237925	1.34416
14	0.0560504	1.91458
15	0.0365681	2.38688
16	0.0186278	2.39755
17	0.272233	1.78701
18	0.240585	1.59899
19	0.0160335	1.73803
20	0.00701998	2.21027
21	0.450518	0.305215
22	0.206414	1.78163
23	15.4817	0.708548
24	36.8044	0.850367
25	0.178049	1.86288
26	4.83463	0.565893
27	2.17745	1.76913
28	0.63736	0.331894
29	0.0299855	1.55281
30	3.51086	1.36528
31	0.418993	0.483797
32	1.54558	0.323294
33	0.450827	0.673204
34	0.0145223	1.18581
35	9.37202	2.14689
36	0.323539	2.05241
37	0.0994534	2.04989
38	0.262278	0.640773
39	0.370854	0.720616
40	22.4781	0.130349
41	12.6018	0.530863
42	14.3011	0.703757
43	0.19423	0.818631
44	21.4696	1.19821
45	1.00494	1.1564
46	0.071956	0.708438
47	0.886455	0.385787
48	0.36172	1.49925
49	3.74711	0.521731
50	0.181655	1.76014
51	2.97836	2.64862
52	0.276185	0.452909
53	0.0846095	0.762879
54	0.452112	2.21924
55	0.0456864	0.389953
56	3.7736	0.898892
57	0.291372	0.133565
58	0.0140666	1.85488
59	0.431045	1.10283
60	3.46947	0.843678
61	23.3002	1.06062
62	1.04233	0.837665
63	0.0244596	1.86473
64	5.00382	0.741167
65	0.692736	1.123
66	6.61829	1.75565
67	2.53811	0.419378
68	6.73102	1.25135
69	1.34141	1.16199
70	0.852432	0.695392
71	0.267246	2.74461
72	0.145333	2.23934
73	0.0285543	1.10601
74	0.654386	1.6053
75	0.255259	0.690279
76	0.0121092	2.17005
77	0.0682848	0.242263
78	0.0597088	0.352941
79	0.0661836	2.60777
80	0.233931	1.16394
81	0.139115	1.63478
82	0.212169	0.533238
83	0.923972	1.01252
84	0.13723	0.726039
85	1.91151	0.277198
86	5.70867	0.113006
87	0.705409	1.84163
88	15.2838	1.10768
89	0.0486172	1.416
90	1.59632	1.31591
91	3.21257	1.78715
92	0.00955841	2.0612
93	0.829607	1.55886
94	0.75536	1.22293
95	1.21251	1.81624
96	0.296624	0.724625
97	0.136483	0.784302
98	0.0909728	0.552322
99	0.50344	0.828929
100	3.69473	0.879649
101	0.950991	0.854423
102	9.67272	0.300378
103	0.677257	0.154699
104	1.1306	1.89029
105	0.217549	2.18409
106	0.0547494	0.43474

## Sheet: primary GEM 
ID	LAI	Growth	B
1	0.314064	0.12468	1.52754
2	0.883138	0.28891
3	0.102137	0.547972
4	0.454941	0.256179
5	0.198113	0.370022
6	0.557626	0.166584
7	0.650132	0.361564
8	0.493798	0.11963
9	1.97595	-0.288395
10	0.915694	0.211605
11	0.27027	0.350433
12	1.24044	0.100837
13	0.472859	0.151339
14	0.436607	0.119776
15	0.213593	0.171185
16	0.367332	-0.250488
17	0.22657	0.49
18	0.887682	0.363882
19	0.239185	-0.0850798
20	5.52032	0.164258
21	0.643655	0.167964
22	0.284738	0.287418
23	0.210728	0.345876
24	1.16222	-0.279678
25	0.690232	0.153244
26	0.272133	0.0854111
27	1.14951	0.224337
28	0.765112	-0.158067
29	0.42034	0.206626
30	0.558186	0.245682
31	0.6716	0.30436
32	0.123853	0.145895
33	0.606183	0.0243937
34	0.4128	-0.132435
35	0.258422	0.456235
36	0.284397	0.117852
37	4.04921	0.101789
38	1.5351	-0.630224
39	1.18945	0.0710257
40	1.13431	-0.129812
41	0.516086	0.479648
42	2.06434	-0.133542
43	0.122032	0.520518
44	0.478588	0.28879
45	0.348138	0.336005
46	1.69572	0.168344
47	3.28811	0.151492
48	0.395878	0.227558
49	0.815645	0.26772
50	0.51628	0.109262
51	0.249024	0.408197
52	0.174624	0.031434
53	1.47922	-0.13127
54	0.459288	-0.304589
55	0.491544	-0.232344
56	2.46225	-0.0208892
57	0.648151	-0.112068
58	0.858275	-0.116649
59	0.394152	0.421134
60	1.36478	-0.337607
61	0.613956	-0.221232
62	1.21272	0.235791
63	0.702291	0.308873
64	0.273414	0.69105
65	0.231489	0.0700111
66	0.899069	0.1925
67	0.950866	0.261214
68	2.12725	0.166774
69	1.27963	0.161213
70	3.12772	0.282216
71	0.28024	0.288481
72	0.16742	-0.100423
73	0.388786	0.217804
74	0.113944	0.503479
75	1.65203	-0.243906
76	0.171226	-0.151733
77	0.170826	0.27867
78	2.91782	0.0929375
79	0.545321	0.140175
80	1.32176	0.216869
81	0.725322	-0.0597022
82	1.14231	-0.0615031
83	2.67225	0.174554
84	1.0904	0.220487
85	0.519676	-0.112228
86	0.340614	0.145397
87	1.20101	0.00913003
88	0.159825	0.292544
89	0.48799	0.387193
90	0.879114	0.204239
91	0.807785	0.190091
92	0.774067	0.156889
93	3.38493	-0.0244411
94	0.260252	-0.0130558
95	0.253992	-0.0684655
96	0.333417	0.318045
97	0.206582	0.273663
98	0.425117	-0.360069
99	0.475465	-0.340879
100	0.319859	0.161418
101	0.107286	0.611378
102	0.153238	0.201786
103	0.472199	-0.209323
104	0.179499	0.157044
105	0.886236	0.067252
106	0.164656	0.251827
107	1.05597	0.533495
108	0.346394	0.135031
109	0.779465	0.216194
110	4.08357	-0.0389981
111	0.113528	0.300045
112	0.363589	0.205827
113	0.11523	0.279991
114	2.3753	0.266008
115	0.0806189	-0.370068
116	0.115991	0.450623
117	0.175593	0.0879049
118	0.0466732	0.2637
119	0.553647	-0.00916883
120	0.407622	-0.0357157
121	0.614551	-0.34205
122	0.0844289	0.344501
123	1.27796	0.122448
124	2.00011	-0.130411
125	0.179528	0.435044
126	0.256434	0.125493
127	1.32044	0.181382
128	0.0666194	0.77198
129	0.0358231	0.348331
130	0.0488805	0.256012
131	0.311019	0.105496
132	1.06991	-0.152794
133	1.4277	0.0875495
134	0.503401	-0.106795
135	0.144162	-0.163327
136	0.277559	0.150078
137	0.459679	-0.0141131
138	0.617661	-0.223059
139	0.583333	0.0954165
140	0.0988425	-0.172998
141	0.488529	-0.0866438
142	0.772882	0.0499462
143	0.11615	0.646176
144	0.526885	0.0846837
145	0.937629	-0.479721
146	0.319466	0.0736734
147	1.16963	-0.177019
148	0.0447101	0.0916992
149	0.112613	0.0920881
150	0.000245733	0.0903323
151	0.379432	0.234042
152	2.18253	-0.300392
153	7.60486	0.181202
154	0.654476	0.433379
155	2.17071	-0.0740618
156	0.910539	0.150069
157	0.391579	0.247591
158	0.343547	0.294051
159	0.615477	0.263504
160	0.517432	0.131826
161	0.178364	0.143173
162	0.386706	0.371748
163	0.395416	-0.153149
164	0.242892	0.552353
165	0.110699	-0.223141
166	0.146975	0.409528
167	0.499779	0.305629
168	0.845003	0.187236
169	0.528173	0.279935
170	0.0686122	0.478197
171	0.381755	0.270985
172	0.55516	0.369788
173	0.131809	0.617839

## Sheet: metastasis GEM
ID	MAI	Growth	B
1	0.00922116	0.874794	2.36424
2	0.0173307	0.84646
3	0.00175666	1.6408
4	0.0933595	1.33169
5	0.0309803	0.033964
6	0.0447694	0.437923
7	0.214436	1.14737
8	2.13512	-0.108944
9	0.113332	-0.819263
10	0.0364127	0.908934
11	0.0984402	0.936696
12	1.21342	0.548699
13	0.32347	1.15894
14	0.285528	-0.182513
15	0.0751882	-0.444897
16	0.141004	1.302
17	0.150136	1.57022
18	0.185577	1.48215
19	0.0272222	0.0157775
20	0.0390992	0.0362111
21	0.0544465	0.127621
22	0.193513	1.24096
23	0.120756	0.118713
24	1.9876	1.53775
25	0.53438	1.42215
26	0.417121	-0.123681
27	0.2938	0.920502
28	0.103181	0.962181
29	0.142664	-0.0611001
30	0.456951	1.63849
31	0.15457	1.66855
32	0.0212642	1.34777
33	0.0630849	-0.589484
34	0.0360338	1.41498
35	0.0651554	1.00303
36	0.0727903	1.51753
37	0.00996054	0.119204
38	0.112894	1.45784
39	0.785359	0.466356
40	0.856055	-0.0964591
41	1.39211	1.31842
42	2.47079	-0.184632
43	0.242317	-0.204158
44	0.189442	1.37506
45	0.0568116	1.19917
46	0.425639	1.25331
47	0.0362543	0.410975
48	0.0301972	0.93588
49	0.547301	0.920508
50	0.028052	0.865931
51	0.172021	0.700859
52	1.27781	-0.847072
53	0.0948107	0.202876
54	0.0744819	0.362676
55	0.0348987	1.41677
56	0.0172041	1.21792
57	0.0467644	0.648731
58	0.222078	0.841306
59	0.420254	0.376746
60	0.220783	0.807409
61	0.0772084	1.4712
62	0.63814	1.41081
63	0.0756078	1.18081
64	0.0856803	1.40379
65	1.26815	1.31275
66	0.197006	-0.0951216
67	0.010156	0.79917
68	0.663024	-0.150785
69	0.18338	-0.610164
70	0.209959	-0.662767
71	1.08154	-0.0400324
72	0.0659081	-0.338852
73	0.10336	0.906601
74	0.890673	0.551993
75	0.015127	0.572483
76	0.0118202	1.07428
77	1.20281	1.24789
78	0.257502	1.02397
79	0.285413	1.16267
80	0.563599	1.33259
81	0.20249	1.51681
82	0.0611634	1.45399
83	0.0667271	1.50843
84	0.0495647	-0.255414
85	0.0147414	1.06342
86	0.183309	-0.55425
87	0.737579	-0.79738
88	1.00974	1.38585
89	0.281542	1.17376
90	0.27108	-0.704828
91	0.144379	0.882395
92	0.110914	-0.20598
93	1.90686	1.02946
94	0.125786	1.2324
95	0.0960906	1.36346
96	0.0895496	1.24169
97	0.194002	0.901913
98	0.179563	0.715089
99	0.139429	1.6273
100	0.110645	1.49359
101	0.0537395	1.43698
102	0.148089	0.951721
103	0.167156	0.707777
104	0.229924	1.27666
105	0.0835131	0.578125
106	0.0444136	1.46918
107	0.486843	0.568591
108	0.750523	-0.624788

## Sheet: primary FFX
ID	LAI	Growth	B
1	0.260501	0.15132	0.663492
2	0.121456	0.38916
3	0.61373	-0.440164
4	0.400369	0.257286
5	0.309269	0.27165
6	0.432733	-0.183848
7	0.324235	0.203083
8	1.08857	-0.664064
9	0.69745	0.215703
10	0.503701	0.237131
11	1.09309	-0.167188
12	0.635157	0.0582034
13	0.19867	-0.358355
14	1.00311	-0.1116
15	0.00795128	-0.774071
16	0.455286	0.20404
17	0.965343	0.298441
18	0.0633986	0.262108
19	0.198596	-0.188717
20	0.561819	0.304928
21	0.12919	-0.129131
22	0.0966539	-0.15804
23	0.263811	-0.249658
24	0.705682	-0.132176
25	0.147202	-0.111238
26	0.183647	-0.57902
27	0.404597	-0.14937
28	0.711519	-0.177406
29	0.50212	0.047072
30	0.0820554	0.18023
31	1.0277	-0.0947275
32	0.498466	-0.17247
33	0.0939599	0.374085
34	0.288799	0.251541
35	0.168933	-0.26966
36	0.571715	0.326703
37	0.0193334	-0.00228782
38	0.731375	0.049746
39	1.05196	-0.0961241
40	0.18277	0.13769
41	0.141751	0.339265
42	0.28749	-0.140682
43	0.0986013	0.34531
44	0.986244	-0.229237
45	0.232463	-0.245291
46	0.245988	-0.0955613
47	0.472026	-0.0569407
48	0.21436	0.268129
49	0.918823	0.300912
50	0.0871597	0.113052
51	0.192644	-0.16988
52	0.655913	-0.0103893
53	0.238691	0.27225
54	0.508211	0.203734
55	0.491793	-0.0109561
56	0.165908	-0.62587
57	0.072082	-0.100002
58	0.102802	-0.241121
59	0.107282	-0.174764
60	0.078625	-0.224751
61	0.236454	-0.334128
62	0.136159	0.00955397
63	0.0563411	0.205143
64	0.200058	-0.19229
65	0.0466021	-0.107766
66	0.36024	0.265981
67	0.380546	-0.198508
68	0.097778	-0.911603
69	0.470335	-0.200099
70	0.231013	-0.20893
71	0.0467647	0.144309
72	0.415193	-0.156858
73	0.0768185	0.221665
74	0.0687637	0.390982
75	0.151384	0.366682
76	0.437909	-0.0215197
77	1.32886	-0.0215238
78	0.341704	0.119652
79	0.341348	-0.557631
80	0.179763	-0.0955007
81	0.227008	0.177774
82	1.1035	0.137462
83	0.190338	0.0862287
84	0.212265	-0.150082
85	0.168904	0.199898
86	0.222729	-0.32691
87	0.6358	-0.529699
88	1.4993	0.242113
89	0.424447	-0.0203214
90	0.343282	-0.0139044
91	0.451121	-0.131767
92	0.374602	-0.230158
93	0.112168	-0.00321822
94	0.707646	-0.165767
95	0.145871	-0.167348
96	0.197866	-0.782993
97	0.414995	0.0641585
98	0.0588693	-0.118073
99	0.372185	0.101025
100	0.134099	0.296292
101	2.08138	-0.250195
102	0.0794472	0.372255
103	0.0601372	-0.0795781
104	0.0447579	0.289057
105	1.9882	-0.00878696
106	0.241101	-0.39973
107	0.317526	0.0810608

## Sheet: metastasis FFX
ID	MAI	Growth	B
1	0.0382874	0.951186	0.161823
2	0.0397316	0.982161
3	0.019653	0.0130936
4	0.035732	1.20054
5	0.0493454	0.991809
6	0.00344867	0.809078
7	0.0654597	0.555586
8	0.0595296	1.11945
9	0.005182	0.362654
10	0.239848	0.297352
11	1.01019	-0.564064
12	0.0175353	0.986606
13	0.0195914	1.15945
14	0.173122	-0.0565838
15	0.198655	0.948696
16	0.0112686	1.13397
17	0.0464313	-0.502472
18	0.0197902	0.913936
19	0.466497	1.19319
20	0.00728681	0.94637
21	0.02494	0.639595
22	6.80231	-0.637341
23	0.0178004	0.740326
24	0.0156507	1.14061
25	2.40158	0.923669
26	0.0106389	-0.590558
27	0.066785	0.905423
28	0.0537787	0.119885
29	0.0225991	1.13156
30	0.060104	1.22446
31	0.00874814	0.79008
32	0.0363519	0.703099
33	0.0192889	0.984465
34	0.00889794	1.18912
35	0.0203412	1.17194
36	0.015232	-0.391233
37	0.0176315	0.712488
38	0.319242	1.13534
39	0.0198349	1.13962
40	0.0513809	1.19183
41	0.0531279	1.08609
42	0.0284224	1.09824
43	0.0442831	0.85601
44	0.0376504	0.98394
45	0.0528009	-0.195727
46	0.0296133	-0.153263
47	0.0104952	-0.624883
48	0.0201228	-0.446181
49	0.0355939	0.980032
50	0.0784148	-0.776376
51	0.239429	0.994508
52	0.0584033	0.994777
53	0.0142831	1.18658
54	0.224652	1.09779
55	0.0248752	1.02961
56	0.0226577	1.13867
57	0.0443425	1.02489
58	0.0382799	1.12088
59	0.121628	1.08227
60	0.118597	0.4843
61	0.0395207	0.928764
62	0.198467	0.827596
63	0.0434348	1.1975
64	1.37601	1.01715
65	0.100701	0.803477
66	0.0156691	1.04573
67	0.125648	-0.758169
68	0.334978	1.16984
69	0.246035	-0.499553
70	0.091721	1.05773
71	0.0197849	0.891536
72	0.00875901	-0.862029
73	0.540946	0.803499
74	0.0213953	0.80556
75	0.073613	1.16437
76	0.0189682	0.441236
77	0.0914436	0.492288
78	0.0346391	1.2155
79	0.103428	-0.296255
80	0.00549062	-0.0643923
81	0.00132112	-0.377164
82	0.0306293	1.00381
83	0.0114781	1.15756
84	1.25517	0.862278
85	0.00281999	1.10843
86	0.00374441	1.16157
87	0.0176741	1.19413
88	0.0543716	1.14789
89	0.00487405	0.558632
90	0.00410636	0.683394
91	0.0245378	-0.746374
92	0.00611393	0.535051
93	0.0224294	-0.481589
94	0.0286203	0.596312
95	0.0432435	1.12547
96	0.0518129	1.0265
97	0.00614138	1.08374
98	0.00559248	1.11415
99	0.00529496	1.16474
100	0.0515043	0.863533
101	0.122562	0.503331
102	0.0102792	-0.795691
103	0.0544385	-0.444559
104	0.0343166	0.938335

## Sheet: primary GEMabraxane
ID	LAI	Growth	B
1	0.216273	0.458525	6.51763
2	2.9011	0.102396
3	1.18578	-0.22395
4	2.19232	0.056094
5	2.43556	-0.14603
6	12.7052	0.038724
7	1.82926	0.032488
8	0.565875	-0.01422
9	8.20212	-0.03966
10	2.74614	-0.10096
11	3.64635	0.163343
12	3.40922	0.044625
13	0.281249	0.367537
14	5.1294	-0.21008
15	1.15201	0.058498
16	1.5973	-0.32842
17	1.54785	-0.21434
18	0.260664	-0.32063
19	0.282527	0.421771
20	0.415355	0.339516
21	0.831208	0.051262
22	3.96831	0.111761
23	0.111038	0.95416
24	1.68912	0.306228
25	6.80111	-0.07284
26	1.29756	-0.1573
27	2.68006	0.092531
28	1.44857	0.296409
29	0.157347	0.456398
30	1.10858	0.155615
31	0.284074	0.723962

## Sheet: metastasis GEMabraxane
ID	MAI	Growth	B
1	60.016	-0.19278	3.24125
2	0.562342	1.28722
3	0.680972	1.98093
4	23.3992	-0.20562
5	0.897145	1.47412
6	13.6141	0.488452
7	1.2969	1.811
8	12.6892	1.63291
9	2.01997	0.640308
10	31.6762	1.34418
11	12.452	1.58353
12	3.75435	1.70341
13	0.549446	1.80005
14	5.35598	-0.72268
15	1.67178	1.73248
16	1.86463	1.37417
17	4.81502	0.486996
18	6.00654	0.056717
19	0.984703	1.84674
20	1.02977	1.72504
